# Supplementary material for: Understanding the importance of atmospheric transformation in assessing the hazards of liquid crystal monomers
Source: Royal Society of Chemistry journal article supplement (doi:10.1039/d3em00424d), 2023-11-30
Supplement: d3em00424d1.xlsx [file d3em00424d1.xlsx]

## Sheet: S1
Product ID	Chemical formula	Proposed chemical structure	POV (hours)	BAF_Piscivorous fish (L/kg)	LC50 (mg/L)	logKOW	logKOW (within AD at least 1 QSPR)	logKOA	logKOA (within AD at least 1 QSPR)	HL_biodeg (hr)	HL_biodeg (hr) (within AD at least 1 QSPR)	HL_fish (hr)	HL_fish (hr) (within AD at least 1 QSPR)	kOH	kOH (within AD at least 1 QSPR)	Pka	Pkb	Pka (within AD at least 1 QSPR)
E0	C23H30		4073.89	97139.8	0.0209	9.33333	OK	10.5883	OK	1084.94	OK	808.115	OK	2.58171e-11	NO			OK
E1	C23H30O2		4831.26	287343	N/A	7.44	OK	12.5597	outAD	1277.72	OK	49.149	OK	2.62973e-11	NO	10.54		NO
E2	C23H30O		3477.76	398415	0.0695	7.34667	OK	12.497	outAD	738.983	OK	85.0323	OK	2.80171e-11	NO	11.71		NO
E3	C23H28O		3655.65	474701	0.0261	7.03333	OK	11.948	OK	634.49	OK	213.016	OK	3.45783e-11	NO			OK
E4	C23H28O2		3115.98	4659.82	0.0436	6.90667	OK	13.219	OK	506.946	OK	39.3779	OK	2.22743e-11	NO	5.43		NO
E5	C23H28O3		7819.32	13941.6	N/A	6.41333	OK	12.7707	outAD	1400.84	OK	19.6315	OK	2.36092e-11	NO	7.27		NO
E6	C23H30O4		9140.31	5137.93	N/A	5.81	OK	14.0803	outAD	1632.1	OK	13.5553	OK	3.14075e-11	NO	10.18		NO
E7	C23H30O3		6406.34	9303.78	N/A	5.83	OK	13.905	outAD	943.86	OK	23.5219	OK	3.09556e-11	NO	13.39		NO
E8	C23H28O3		5819.73	14395.8	N/A	5.92333	OK	13.0493	outAD	810.397	OK	31.071	OK	3.63145e-11	NO	9.28		NO
E9	C23H26O2		5165.88	48534	0.0344	6.06	OK	12.5687	OK	695.567	OK	115.584	OK	3.72588e-11	NO			OK
E10	C23H26O4		6610.43	1546.61	N/A	4.76333	OK	13.5833	outAD	888.482	OK	17.2078	OK	3.93291e-11	NO	8.05		NO
E11	C23H26O3		4429.15	2797.07	0.0334	4.79	OK	12.7543	OK	513.933	OK	36.8367	OK	3.95752e-11	NO	8.47		NO
E12	C23H24O3		5695.81	8600.88	0.0644	5.43667	OK	13.7533	OK	762.646	OK	64.5555	OK	3.31112e-11	NO			OK
E13	C23H28O4		4744.09	1284.78	N/A	5.85	OK	14.4703	outAD	647.547	OK	10.5632	OK	2.4417e-11	NO	6.42		NO
E14	C23H30O6		10712.6	353.755	N/A	4.46667	OK	15.8913	outAD	2084.36	OK	3.70044	OK	3.37853e-11	NO	10.07		OK
E15	C23H30O5		7742.36	581.331	N/A	4.37333	OK	15.8327	outAD	1205.8	OK	6.28637	OK	3.52149e-11	NO	11.73	5.02	NO
E16	C23H28O5		10024	429.994	N/A	4.54333	OK	14.5733	outAD	1741.66	OK	4.61224	OK	3.15788e-11	NO	9.19		NO
E17	C23H30O		2605.72	335880	0.0257	8.22	OK	12.6923	OK	959.766	OK	93.8582	OK	4.56082e-11	NO	10.82		NO
E18	C23H32O3		4672.97	60754.2	N/A	6.75667	OK	13.354	outAD	799.216	OK	18.4655	OK	1.3643e-10	NO		5.85	NO
E19	C23H32O2		1908.61	187495	0.0427	7.50667	OK	11.772	outAD	462.312	OK	29.6073	OK	1.62697e-10	NO	10.72		NO
E20	C23H30O2		3143.9	180939	0.0676	7.41333	OK	12.0633	OK	721.87	OK	29.1449	OK	1.25166e-10	NO	8.92		NO
E21	C23H32O5		9458.95	665.867	N/A	4.25333	OK	14.399	outAD	1548.13	OK	7.87296	OK	6.14016e-11	NO		6.25	NO
E22	C23H32O4		6764.19	970.218	N/A	4.25667	OK	13.4033	outAD	895.598	OK	12.7176	OK	6.19029e-11	NO		6.67	NO
E23	C23H30O4		9082.76	1091	N/A	4.37667	OK	13.598	outAD	1398.46	OK	13.2027	OK	6.04938e-11	NO	9.84		NO
E24	C19H24O2		2604.49	11097.1	0.1	5.57667	OK	11.3897	OK	274.877	OK	67.5965	OK	5.68872e-11	NO			OK
E25	C19H24O3		2018.5	54.2204	0.14	5.31667	OK	13.2473	OK	219.657	OK	12.4262	OK	3.6817e-11	NO	4.07		NO
E26	C19H24O4		1613.22	63.888	0.57	5.25	OK	13.7817	outAD	175.521	OK	4.08329	OK	2.6649e-11	NO	4.36		NO
E27	C18H24O3		2397.91	10.6025	0.21	4.19667	OK	12.6757	OK	252.41	OK	13.4939	OK	3.47719e-11	NO	3.89		NO
E28	C21H28O2		6652.78	89482.7	0.54	6.32	OK	11.6973	OK	1008.85	OK	112.61	OK	3.85002e-11	NO			OK
E29	C21H28O4		8122.09	1331.9	N/A	4.8	OK	13.446	outAD	1187.81	OK	14.0283	OK	4.25136e-11	NO	9.26		NO
E30	C21H28O3		5494.08	2127.08	0.38	4.62	OK	13.42	outAD	687.151	OK	26.8154	OK	4.49266e-11	NO	10		NO
E31	C21H26O3		5015.84	4097.01	0.0539	4.65	OK	12.5373	OK	589.879	OK	88.8644	OK	4.80196e-11	NO			OK
E32	C21H26O4		3910.39	171.909	0.25	5.08333	OK	14.0517	outAD	471.389	OK	15.8021	OK	3.31049e-11	NO	5.03		NO
E33	C23H34O4		1648.35	982.204	0.31	5.49	OK	11.957	OK	169.816	OK	5.6579	OK	2.89056e-10	NO	10.1		OK
E34	C21H26O2		6927.24	69434.7	N/A	6.57	OK	12.0317	OK	1185.25	OK	32.6146	OK	2.47318e-11	NO	10.26		NO
E35	C21H26O		4417.24	150118	0.0795	6.73333	OK	11.8727	OK	685.624	OK	55.7908	OK	2.42642e-11	NO	11.24		NO
E36	C21H24O		3515.91	144359	0.027	6.49	OK	11.0397	OK	588.569	OK	132.562	OK	3.43597e-11	NO			OK
E37	C21H24O2		3746.4	1342.98	0.0426	6.11667	OK	12.5573	outAD	470.291	OK	25.608	OK	2.02737e-11	NO	5.2		NO
E38	C16H22O2		3046.33	526.659	3.11	5.81333	OK	10.664	OK	472.773	OK	9.80234	OK	1.54086e-11	NO	5.23		NO
E39	C16H22O4		4861.93	140.373	N/A	4.19333	OK	12.325	outAD	556.595	OK	2.62485	OK	1.75843e-11	NO	6.29		NO
E40	C16H20O3		2696.07	23.7427	1.47	3.99667	OK	11.8337	OK	276.44	OK	7.9378	OK	3.37853e-11	NO	4.96		NO
F0	C23H23F		8936.46	589317	0.00873	7.93	OK	10.9977	OK	2364.98	OK	231.231	OK	1.4025e-11	NO			OK
F1	C23H23FO2		10239.8	105918	N/A	6.81	OK	12.866	outAD	2784.83	OK	29.5129	OK	1.76371e-11	NO	11.25		NO
F2	C23H23FO		7749.81	156361	0.0225	6.73333	OK	12.7973	outAD	1610.89	OK	57.1085	OK	1.67967e-11	NO	11.39		NO
F3	C23H21FO		7607.34	193186	0.014	6.55	OK	12.341	OK	1382.86	OK	181.602	OK	2.60084e-11	NO			OK
F4	C23H21FO2		6460.52	691.425	0.0126	6.45667	OK	13.522	OK	1105.1	OK	33.4925	OK	1.32924e-11	NO	4.15		NO
F5	C23H21FO3		13281.6	2699.49	N/A	5.57667	OK	13.0773	outAD	3053.13	OK	17.846	OK	1.47214e-11	NO	7.35		NO
F6	C23H23FO4		13973.2	996.241	N/A	5.07667	OK	14.4103	outAD	3557.17	OK	8.68201	OK	2.02085e-11	NO	9.5		NO
F7	C23H23FO3		10901.4	1827.16	N/A	5.07333	OK	14.235	outAD	2057.67	OK	16.058	OK	1.97739e-11	NO	12.22		NO
F8	C23H21FO3		10478.2	2035.16	N/A	4.59333	OK	13.3553	outAD	1766.52	OK	26.5628	OK	2.87204e-11	NO	8.26		NO
F9	C23H19FO2		9707.98	4584.73	0.0181	4.67	OK	12.8887	OK	1516.21	OK	114.002	OK	2.54951e-11	NO			OK
F10	C23H19FO3		8201.65	12.0572	0.028	4.38	OK	13.8867	outAD	1211.45	OK	20.1533	OK	1.4803e-11	NO	2.78		NO
F11	C23H21FO4		8696.19	243.917	N/A	4.85333	OK	14.8033	outAD	1411.33	OK	9.3258	OK	1.87926e-11	NO	4.73		NO
F12	C23H23FO5		12303.3	351.828	N/A	3.55667	OK	15.823	outAD	2649.79	OK	5.12943	OK	2.31353e-11	NO	11.65		OK
F13	C23H21FO5		14295.5	377.967	N/A	3.81333	OK	14.9457	outAD	3572.52	OK	5.25978	OK	2.16231e-11	NO	7.77		NO
F14	C23H23FO		6137.7	349080	0.00804	7.47	OK	12.9957	outAD	2092.12	OK	63.3142	OK	3.27713e-11	NO	9.61		NO
F15	C23H25FO3		8965.65	11198.9	N/A	6.27667	OK	13.684	outAD	1742.15	OK	10.12	OK	1.32563e-10	NO	13.59		NO
F16	C23H25FO2		5323.04	69159.2	0.00933	6.93	OK	12.102	outAD	1007.67	OK	16.2645	OK	1.33259e-10	NO	11.86		NO
F17	C23H25FO5		14288.2	238.347	N/A	3.30333	OK	14.3427	outAD	3374.82	OK	4.23225	OK	7.18686e-11	NO	9.38		NO
F18	C23H25FO4		11263.6	409.48	N/A	3.72667	OK	13.3503	outAD	1951.96	OK	6.87142	OK	5.43687e-11	NO		7.05	NO
F19	C23H23FO4		13994.6	524.052	N/A	3.61333	OK	13.4987	outAD	3048.21	OK	9.47858	OK	5.30407e-11	NO	10.12		NO
F20	C21H21FO2		11960.8	10688.8	0.0425	5.48667	OK	11.8643	OK	2199.11	OK	85.9751	OK	2.93191e-11	NO			OK
F21	C21H21FO4		12865.1	587.062	N/A	3.67	OK	13.769	outAD	2589.5	OK	10.6701	OK	3.467e-11	NO	8.59		NO
F22	C21H21FO3		9548.66	922.744	0.11	3.74	OK	13.6703	outAD	1497.54	OK	20.4562	OK	3.41891e-11	NO	8.87		NO
F23	C21H19FO3		8806.72	1130.36	0.0422	3.62333	OK	13.224	OK	1285.78	OK	67.5225	OK	3.25838e-11	NO			OK
F24	C21H19FO4		7287.42	3.92465	0.0706	3.64333	OK	14.3917	OK	1027.4	OK	11.9976	OK	3.96128e-11	NO	3.98		NO
F25	C15H13FO2		8150.2	26.0628	1.99	4.35667	OK	10.4487	OK	992.466	OK	5.31669	OK	9.28095e-12	NO	4.41		NO
F26	C15H11FO3		5211.62	1.88522	1.39	3.00667	OK	11.6347	OK	580.315	OK	4.29796	OK	2.67572e-11	NO	4.12		NO

## Sheet: S2
Product ID	Persistence	Bioaccumulation potential	Mobility	Acute toxicity	Carcinogenicity			Mutagenicity (Ames test)
model	POV (hours)	Piscivorous fish BAF(L/kg)	Lowest log10KOC in the pH range of 4-9	Fathead minnow LC50 (mg/L)	IRFMN/Antares model	CAESAR model	ISS model	CAESAR model	ISS model
E0	4073.89	97139.8	7.00033	0.0209	Possible NON-Carcinogen (low reliability)	Carcinogen (good reliability)	NON-Carcinogen (low reliability)	Mutagenic (low reliability)	NON-Mutagenic (moderate reliability)
E1	4831.26	287343	5.71476	N/A	Possible NON-Carcinogen (low reliability)	NON-Carcinogen (low reliability)	NON-Carcinogen (low reliability)	NON-Mutagenic (good reliability)	Mutagenic (low reliability)
E2	3477.76	398415	5.65139	0.0695	Possible NON-Carcinogen (moderate reliability)	NON-Carcinogen (low reliability)	NON-Carcinogen (low reliability)	NON-Mutagenic (low reliability)	NON-Mutagenic (moderate reliability)
E3	3655.65	474701	5.43863	0.0261	Possible NON-Carcinogen (good reliability)	NON-Carcinogen (low reliability)	Carcinogen (low reliability)	Mutagenic (moderate reliability)	Mutagenic (low reliability)
E4	3115.98	4659.82	5.35263	0.0436	Possible NON-Carcinogen (low reliability)	NON-Carcinogen (low reliability)	NON-Carcinogen (low reliability)	NON-Mutagenic (good reliability)	NON-Mutagenic (moderate reliability)
E5	7819.32	13941.6	5.01765	N/A	Possible NON-Carcinogen (low reliability)	NON-Carcinogen (low reliability)	NON-Carcinogen (low reliability)	NON-Mutagenic (good reliability)	Mutagenic (low reliability)
E6	9140.31	5137.93	4.60799	N/A	Possible NON-Carcinogen (low reliability)	NON-Carcinogen (low reliability)	NON-Carcinogen (low reliability)	NON-Mutagenic (good reliability)	Mutagenic (low reliability)
E7	6406.34	9303.78	4.62157	N/A	Possible NON-Carcinogen (low reliability)	NON-Carcinogen (low reliability)	NON-Carcinogen (low reliability)	NON-Mutagenic (good reliability)	Mutagenic (low reliability)
E8	5819.73	14395.8	4.68494	N/A	Possible NON-Carcinogen (low reliability)	NON-Carcinogen (low reliability)	Carcinogen (low reliability)	NON-Mutagenic (good reliability)	Mutagenic (low reliability)
E9	5165.88	48534	4.77774	0.0344	Possible NON-Carcinogen (good reliability)	NON-Carcinogen (low reliability)	Carcinogen (low reliability)	Mutagenic (low reliability)	Mutagenic (low reliability)
E10	6610.43	1546.61	3.8973	N/A	Possible NON-Carcinogen (low reliability)	NON-Carcinogen (low reliability)	Carcinogen (low reliability)	NON-Mutagenic (good reliability)	Mutagenic (low reliability)
E11	4429.15	2797.07	3.91541	0.0334	Possible NON-Carcinogen (moderate reliability)	NON-Carcinogen (moderate reliability)	Carcinogen (low reliability)	NON-Mutagenic (good reliability)	Mutagenic (low reliability)
E12	5695.81	8600.88	4.3545	0.0644	Possible NON-Carcinogen (moderate reliability)	NON-Carcinogen (moderate reliability)	Carcinogen (low reliability)	NON-Mutagenic (good reliability)	Mutagenic (low reliability)
E13	4744.09	1284.78	4.63515	N/A	Possible NON-Carcinogen (low reliability)	NON-Carcinogen (low reliability)	NON-Carcinogen (low reliability)	NON-Mutagenic (good reliability)	Mutagenic (low reliability)
E14	10712.6	353.755	3.69587	N/A	Possible NON-Carcinogen (moderate reliability)	NON-Carcinogen (low reliability)	NON-Carcinogen (low reliability)	NON-Mutagenic (moderate reliability)	Mutagenic (low reliability)
E15	7742.36	581.331	3.63249	N/A	Possible NON-Carcinogen (low reliability)	NON-Carcinogen (low reliability)	NON-Carcinogen (low reliability)	NON-Mutagenic (good reliability)	Mutagenic (low reliability)
E16	10024	429.994	3.74792	N/A	Possible NON-Carcinogen (low reliability)	NON-Carcinogen (low reliability)	NON-Carcinogen (low reliability)	NON-Mutagenic (moderate reliability)	Mutagenic (low reliability)
E17	2605.72	335880	6.24438	0.0257	Possible NON-Carcinogen (moderate reliability)	NON-Carcinogen (moderate reliability)	NON-Carcinogen (low reliability)	NON-Mutagenic (moderate reliability)	NON-Mutagenic (moderate reliability)
E18	4672.97	60754.2	5.25078	N/A	Carcinogen (low reliability)	NON-Carcinogen (moderate reliability)	NON-Carcinogen (low reliability)	NON-Mutagenic (moderate reliability)	Mutagenic (low reliability)
E19	1908.61	187495	5.76003	0.0427	Carcinogen (moderate reliability)	NON-Carcinogen (moderate reliability)	NON-Carcinogen (low reliability)	NON-Mutagenic (moderate reliability)	NON-Mutagenic (moderate reliability)
E20	3143.9	180939	5.69665	0.0676	Carcinogen (low reliability)	NON-Carcinogen (moderate reliability)	Carcinogen (low reliability)	NON-Mutagenic (moderate reliability)	Mutagenic (low reliability)
E21	9458.95	665.867	3.55101	N/A	Possible NON-Carcinogen (moderate reliability)	NON-Carcinogen (moderate reliability)	NON-Carcinogen (low reliability)	NON-Mutagenic (low reliability)	Mutagenic (low reliability)
E22	6764.19	970.218	3.55328	N/A	Possible NON-Carcinogen (low reliability)	NON-Carcinogen (moderate reliability)	NON-Carcinogen (low reliability)	NON-Mutagenic (low reliability)	NON-Mutagenic (low reliability)
E23	9082.76	1091	3.63476	N/A	Possible NON-Carcinogen (low reliability)	NON-Carcinogen (moderate reliability)	NON-Carcinogen (low reliability)	NON-Mutagenic (low reliability)	NON-Mutagenic (low reliability)
E24	2604.49	11097.1	4.44956	0.1	Possible NON-Carcinogen (moderate reliability)	Carcinogen (moderate reliability)	Carcinogen (low reliability)	NON-Mutagenic (good reliability)	Mutagenic (low reliability)
E25	2018.5	54.2204	4.27302	0.14	Possible NON-Carcinogen (moderate reliability)	NON-Carcinogen (moderate reliability)	Carcinogen (low reliability)	NON-Mutagenic (good reliability)	Mutagenic (low reliability)
E26	1613.22	63.888	4.22775	0.57	Possible NON-Carcinogen (moderate reliability)	NON-Carcinogen (moderate reliability)	NON-Carcinogen (low reliability)	NON-Mutagenic (good reliability)	NON-Mutagenic (moderate reliability)
E27	2397.91	10.6025	3.51254	0.21	Possible NON-Carcinogen (good reliability)	NON-Carcinogen (moderate reliability)	Carcinogen (low reliability)	NON-Mutagenic (good reliability)	Mutagenic (low reliability)
E28	6652.78	89482.7	4.95428	0.54	Possible NON-Carcinogen (moderate reliability)	NON-Carcinogen (low reliability)	Carcinogen (low reliability)	NON-Mutagenic (moderate reliability)	Mutagenic (low reliability)
E29	8122.09	1331.9	3.9222	N/A	Possible NON-Carcinogen (low reliability)	NON-Carcinogen (low reliability)	Carcinogen (low reliability)	NON-Mutagenic (low reliability)	Mutagenic (low reliability)
E30	5494.08	2127.08	3.79998	0.38	Possible NON-Carcinogen (moderate reliability)	NON-Carcinogen (low reliability)	Carcinogen (moderate reliability)	NON-Mutagenic (moderate reliability)	Mutagenic (low reliability)
E31	5015.84	4097.01	3.82035	0.0539	Possible NON-Carcinogen (moderate reliability)	NON-Carcinogen (low reliability)	Carcinogen (moderate reliability)	NON-Mutagenic (moderate reliability)	Mutagenic (low reliability)
E32	3910.39	171.909	4.11458	0.25	Possible NON-Carcinogen (moderate reliability)	NON-Carcinogen (low reliability)	Carcinogen (low reliability)	NON-Mutagenic (moderate reliability)	Mutagenic (low reliability)
E33	1648.35	982.204	4.39071	0.31	Carcinogen (low reliability)	NON-Carcinogen (good reliability)	NON-Carcinogen (low reliability)	NON-Mutagenic (good reliability)	NON-Mutagenic (moderate reliability)
E34	6927.24	69434.7	5.12403	N/A	Possible NON-Carcinogen (low reliability)	NON-Carcinogen (low reliability)	NON-Carcinogen (low reliability)	NON-Mutagenic (good reliability)	Mutagenic (low reliability)
E35	4417.24	150118	5.23493	0.0795	Possible NON-Carcinogen (low reliability)	NON-Carcinogen (low reliability)	NON-Carcinogen (low reliability)	NON-Mutagenic (moderate reliability)	NON-Mutagenic (moderate reliability)
E36	3515.91	144359	5.06971	0.027	Possible NON-Carcinogen (good reliability)	NON-Carcinogen (low reliability)	Carcinogen (low reliability)	Mutagenic (moderate reliability)	Mutagenic (low reliability)
E37	3746.4	1342.98	4.81622	0.0426	Possible NON-Carcinogen (low reliability)	NON-Carcinogen (low reliability)	NON-Carcinogen (low reliability)	NON-Mutagenic (good reliability)	NON-Mutagenic (moderate reliability)
E38	3046.33	526.659	4.61025	3.11	Possible NON-Carcinogen (good reliability)	NON-Carcinogen (low reliability)	NON-Carcinogen (low reliability)	NON-Mutagenic (good reliability)	NON-Mutagenic (moderate reliability)
E39	4861.93	140.373	3.51027	N/A	Possible NON-Carcinogen (moderate reliability)	NON-Carcinogen (low reliability)	NON-Carcinogen (low reliability)	NON-Mutagenic (good reliability)	Mutagenic (low reliability)
E40	2696.07	23.7427	3.37674	1.47	Possible NON-Carcinogen (moderate reliability)	NON-Carcinogen (low reliability)	Carcinogen (low reliability)	NON-Mutagenic (good reliability)	Mutagenic (low reliability)
F0	8936.46	589317	6.04747	0.00873	Possible NON-Carcinogen (moderate reliability)	NON-Carcinogen (moderate reliability)	NON-Carcinogen (low reliability)	Mutagenic (good reliability)	NON-Mutagenic (low reliability)
F1	10239.8	105918	5.28699	N/A	Possible NON-Carcinogen (low reliability)	NON-Carcinogen (moderate reliability)	NON-Carcinogen (low reliability)	NON-Mutagenic (low reliability)	Mutagenic (low reliability)
F2	7749.81	156361	5.23493	0.0225	Possible NON-Carcinogen (good reliability)	NON-Carcinogen (moderate reliability)	NON-Carcinogen (moderate reliability)	Mutagenic (moderate reliability)	NON-Mutagenic (low reliability)
F3	7607.34	193186	5.11045	0.014	Possible NON-Carcinogen (moderate reliability)	NON-Carcinogen (moderate reliability)	Carcinogen (moderate reliability)	Mutagenic (moderate reliability)	Mutagenic (low reliability)
F4	6460.52	691.425	5.04708	0.0126	Possible NON-Carcinogen (moderate reliability)	NON-Carcinogen (low reliability)	NON-Carcinogen (low reliability)	Mutagenic (moderate reliability)	NON-Mutagenic (low reliability)
F5	13281.6	2699.49	4.44956	N/A	Possible NON-Carcinogen (low reliability)	NON-Carcinogen (low reliability)	NON-Carcinogen (low reliability)	Mutagenic (low reliability)	Mutagenic (low reliability)
F6	13973.2	996.241	4.11006	N/A	Possible NON-Carcinogen (moderate reliability)	NON-Carcinogen (moderate reliability)	NON-Carcinogen (low reliability)	NON-Mutagenic (low reliability)	Mutagenic (low reliability)
F7	10901.4	1827.16	4.10779	N/A	Possible NON-Carcinogen (moderate reliability)	NON-Carcinogen (moderate reliability)	NON-Carcinogen (low reliability)	NON-Mutagenic (low reliability)	Mutagenic (low reliability)
F8	10478.2	2035.16	3.78187	N/A	Possible NON-Carcinogen (moderate reliability)	NON-Carcinogen (moderate reliability)	Carcinogen (low reliability)	NON-Mutagenic (low reliability)	Mutagenic (low reliability)
F9	9707.98	4584.73	3.83393	0.0181	Possible NON-Carcinogen (moderate reliability)	NON-Carcinogen (moderate reliability)	Carcinogen (moderate reliability)	Mutagenic (moderate reliability)	Mutagenic (low reliability)
F10	8201.65	12.0572	3.63702	0.028	Possible NON-Carcinogen (moderate reliability)	NON-Carcinogen (low reliability)	NON-Carcinogen (moderate reliability)	Mutagenic (moderate reliability)	NON-Mutagenic (low reliability)
F11	8696.19	243.917	3.95841	N/A	Possible NON-Carcinogen (moderate reliability)	NON-Carcinogen (low reliability)	NON-Carcinogen (low reliability)	NON-Mutagenic (moderate reliability)	Mutagenic (low reliability)
F12	12303.3	351.828	3.07798	N/A	Possible NON-Carcinogen (low reliability)	NON-Carcinogen (moderate reliability)	NON-Carcinogen (low reliability)	NON-Mutagenic (moderate reliability)	Mutagenic (low reliability)
F13	14295.5	377.967	3.25225	N/A	Possible NON-Carcinogen (low reliability)	NON-Carcinogen (low reliability)	NON-Carcinogen (low reliability)	NON-Mutagenic (moderate reliability)	Mutagenic (low reliability)
F14	6137.7	349080	5.73513	0.00804	Possible NON-Carcinogen (moderate reliability)	NON-Carcinogen (moderate reliability)	NON-Carcinogen (low reliability)	NON-Mutagenic (low reliability)	NON-Mutagenic (low reliability)
F15	8965.65	11198.9	4.92486	N/A	Carcinogen (low reliability)	NON-Carcinogen (low reliability)	NON-Carcinogen (low reliability)	NON-Mutagenic (low reliability)	Mutagenic (low reliability)
F16	5323.04	69159.2	5.36847	0.00933	Carcinogen (moderate reliability)	NON-Carcinogen (low reliability)	NON-Carcinogen (low reliability)	NON-Mutagenic (low reliability)	NON-Mutagenic (low reliability)
F17	14288.2	238.347	2.90596	N/A	Carcinogen (low reliability)	NON-Carcinogen (low reliability)	NON-Carcinogen (low reliability)	NON-Mutagenic (moderate reliability)	Mutagenic (low reliability)
F18	11263.6	409.48	3.19341	N/A	Carcinogen (low reliability)	NON-Carcinogen (low reliability)	NON-Carcinogen (low reliability)	NON-Mutagenic (moderate reliability)	NON-Mutagenic (low reliability)
F19	13994.6	524.052	3.11645	N/A	Carcinogen (low reliability)	NON-Carcinogen (low reliability)	Carcinogen (low reliability)	NON-Mutagenic (moderate reliability)	Mutagenic (low reliability)
F20	11960.8	10688.8	4.38845	0.0425	Possible NON-Carcinogen (moderate reliability)	NON-Carcinogen (low reliability)	Carcinogen (moderate reliability)	Mutagenic (low reliability)	Mutagenic (low reliability)
F21	12865.1	587.062	3.15493	N/A	Possible NON-Carcinogen (low reliability)	NON-Carcinogen (low reliability)	Carcinogen (low reliability)	NON-Mutagenic (moderate reliability)	Mutagenic (low reliability)
F22	9548.66	922.744	3.20246	0.11	Possible NON-Carcinogen (moderate reliability)	NON-Carcinogen (low reliability)	Carcinogen (moderate reliability)	Mutagenic (low reliability)	Mutagenic (low reliability)
F23	8806.72	1130.36	3.12324	0.0422	Possible NON-Carcinogen (moderate reliability)	NON-Carcinogen (low reliability)	Carcinogen (moderate reliability)	Mutagenic (low reliability)	Mutagenic (low reliability)
F24	7287.42	3.92465	3.13682	0.0706	Possible NON-Carcinogen (moderate reliability)	NON-Carcinogen (low reliability)	Carcinogen (moderate reliability)	Mutagenic (low reliability)	Mutagenic (low reliability)
F25	8150.2	26.0628	3.62118	1.99	Possible NON-Carcinogen (good reliability)	NON-Carcinogen (moderate reliability)	NON-Carcinogen (moderate reliability)	NON-Mutagenic (low reliability)	NON-Mutagenic (low reliability)
F26	5211.62	1.88522	2.70453	1.39	Possible NON-Carcinogen (good reliability)	Carcinogen (moderate reliability)	Carcinogen (moderate reliability)	NON-Mutagenic (low reliability)	Mutagenic (low reliability)
