# Supplementary material for: Understanding the importance of atmospheric transformation in assessing the hazards of liquid crystal monomers
Source: Royal Society of Chemistry journal article supplement (doi:10.1039/d3em00424d), 2023-11-30
Supplement: d3em00424d2.pdf [file d3em00424d2.pdf]

## Supporting Information for

### Understanding the importance of atmospheric transformation in assessing the hazards of liquid crystal monomers

Jinlong Wang,<sup>†, #</sup> Shenghong Wang,<sup>‡, #</sup> Zhizhen Zhang<sup>‡</sup>, Xinkai Wang,<sup>†</sup> Kaihui Xia,<sup>†</sup> Li Li,<sup>‡,\*</sup> and Qifan Liu<sup>†, §, \*</sup>

<sup>†</sup> Anhui Key Laboratory of Polar Environment and Global Change, Department of Environmental Science and Engineering, University of Science and Technology of China, Hefei 230026, China

<sup>‡</sup> School of Public Health, University of Nevada Reno, Reno, NV 89557-274, United States

<sup>§</sup> State Key Laboratory of Fire Science, University of Science and Technology of China, Hefei 230026, China

<sup>#</sup> These authors contributed equally to this work.

<sup>\*</sup> Corresponding authors.

Email: lili@unr.edu (L.L.); liuqifan@ustc.edu.cn (Q.L.)

This document contains 10 pages, including 2 figures and 1 table.

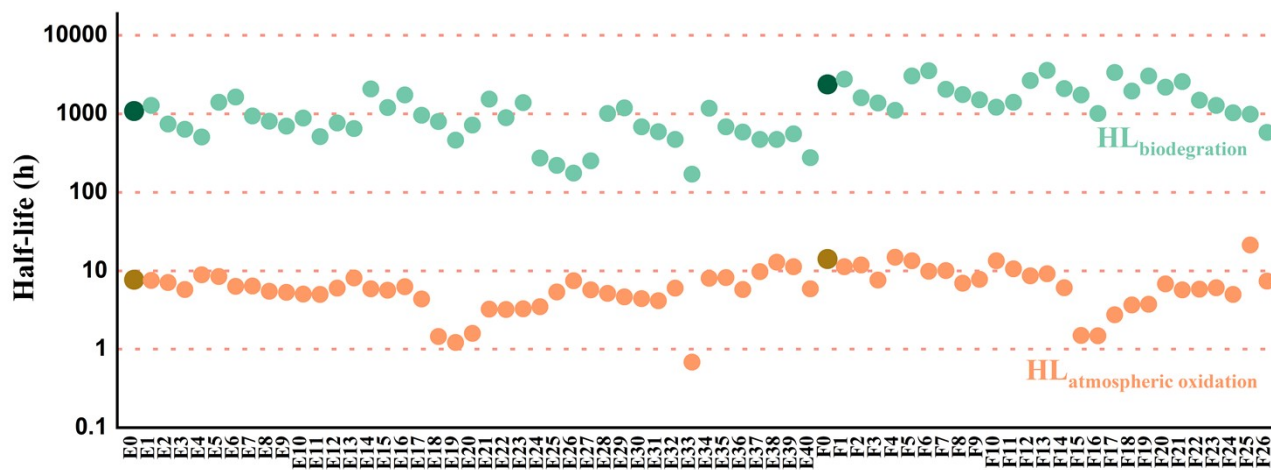

**Figure S1.** Comparison between the reaction half-lives of atmospheric photo-oxidation (orange) and biodegradation in surface media (green) of EPPB and EFPT (dark colors) and their transformation products (light colors).

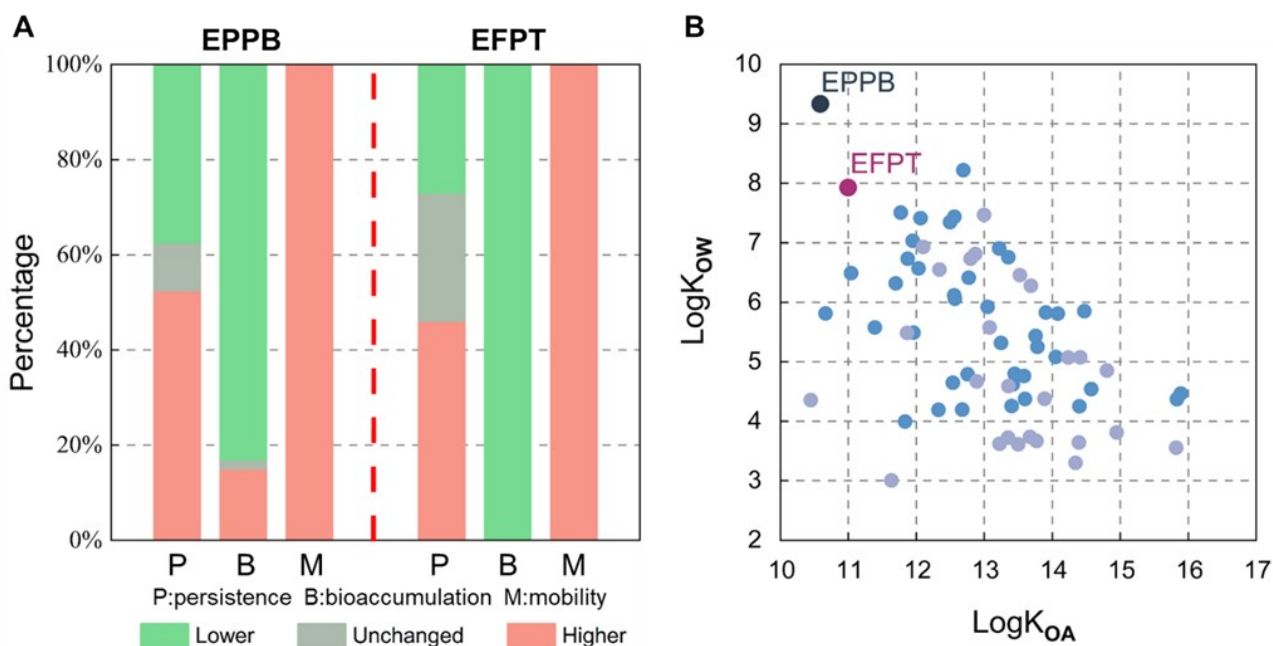

**Figure S2.** (A) The percentage of transformation products with their persistence, bioaccumulation potential and mobility higher (red), lower (green), and unchanged (grey) relative to the parent LCMs (EPPB and EFPT). Properties within  $\pm 10\%$  of the parent LCMs are considered unchanged. (B) The octanol–air ( $\log K_{OA}$ ) and octanol–water ( $\log K_{OW}$ ) partition coefficients for LCMs and their transformation products at a pH of 7. Dark blue, and light blue represent EPPB and its transformation products, respectively. Dark purple and light purple represent EFPT and its transformation products, respectively.

**Table S1.** Structures of transformation products formed from atmospheric OH oxidation of two LCMs (EPPB and EFPT).

| Product ID     | Chemical formula                               | Proposed chemical structure                                                          |
|----------------|------------------------------------------------|--------------------------------------------------------------------------------------|
| E <sub>0</sub> | C <sub>23</sub> H <sub>30</sub>                | 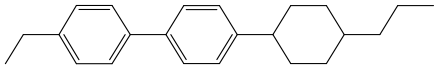   |
| E <sub>1</sub> | C <sub>23</sub> H <sub>30</sub> O <sub>2</sub> |    |
| E <sub>2</sub> | C <sub>23</sub> H <sub>30</sub> O              |    |
| E <sub>3</sub> | C <sub>23</sub> H <sub>28</sub> O              |    |
| E <sub>4</sub> | C <sub>23</sub> H <sub>28</sub> O <sub>2</sub> |  |
| E <sub>5</sub> | C <sub>23</sub> H <sub>28</sub> O <sub>3</sub> |  |
| E <sub>6</sub> | C <sub>23</sub> H <sub>30</sub> O <sub>4</sub> |  |
| E <sub>7</sub> | C <sub>23</sub> H <sub>30</sub> O <sub>3</sub> |  |
| E <sub>8</sub> | C <sub>23</sub> H <sub>28</sub> O <sub>3</sub> |  |
| E <sub>9</sub> | C <sub>23</sub> H <sub>26</sub> O <sub>2</sub> |  |

|                 |                                                |                                                                                      |
|-----------------|------------------------------------------------|--------------------------------------------------------------------------------------|
| E <sub>10</sub> | C <sub>23</sub> H <sub>26</sub> O <sub>4</sub> | 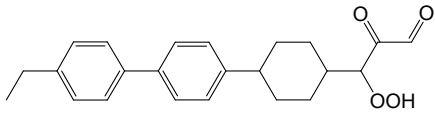   |
| E <sub>11</sub> | C <sub>23</sub> H <sub>26</sub> O <sub>3</sub> |    |
| E <sub>12</sub> | C <sub>23</sub> H <sub>24</sub> O <sub>3</sub> |    |
| E <sub>13</sub> | C <sub>23</sub> H <sub>28</sub> O <sub>4</sub> |    |
| E <sub>14</sub> | C <sub>23</sub> H <sub>30</sub> O <sub>6</sub> |    |
| E <sub>15</sub> | C <sub>23</sub> H <sub>30</sub> O <sub>5</sub> |   |
| E <sub>16</sub> | C <sub>23</sub> H <sub>28</sub> O <sub>5</sub> |  |
| E <sub>17</sub> | C <sub>23</sub> H <sub>30</sub> O              |  |
| E <sub>18</sub> | C <sub>23</sub> H <sub>32</sub> O <sub>3</sub> |  |
| E <sub>19</sub> | C <sub>23</sub> H <sub>32</sub> O <sub>2</sub> |  |
| E <sub>20</sub> | C <sub>23</sub> H <sub>30</sub> O <sub>2</sub> |  |

|                 |                                                |                                                                                      |
|-----------------|------------------------------------------------|--------------------------------------------------------------------------------------|
| E <sub>21</sub> | C <sub>23</sub> H <sub>32</sub> O <sub>5</sub> | 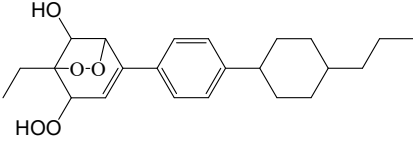   |
| E <sub>22</sub> | C <sub>23</sub> H <sub>32</sub> O <sub>4</sub> |    |
| E <sub>23</sub> | C <sub>23</sub> H <sub>30</sub> O <sub>4</sub> |    |
| E <sub>24</sub> | C <sub>19</sub> H <sub>24</sub> O <sub>2</sub> |    |
| E <sub>25</sub> | C <sub>19</sub> H <sub>24</sub> O <sub>3</sub> |   |
| E <sub>26</sub> | C <sub>19</sub> H <sub>24</sub> O <sub>4</sub> |  |
| E <sub>27</sub> | C <sub>18</sub> H <sub>24</sub> O <sub>3</sub> |  |
| E <sub>28</sub> | C <sub>21</sub> H <sub>28</sub> O <sub>2</sub> |  |
| E <sub>29</sub> | C <sub>21</sub> H <sub>28</sub> O <sub>4</sub> |  |
| E <sub>30</sub> | C <sub>21</sub> H <sub>28</sub> O <sub>3</sub> |  |

|                 |                                                 |                                                                                      |
|-----------------|-------------------------------------------------|--------------------------------------------------------------------------------------|
| E <sub>31</sub> | C <sub>21</sub> H <sub>26</sub> O <sub>3</sub>  | 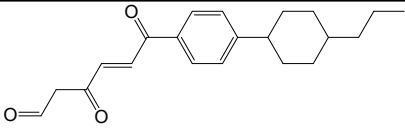   |
| E <sub>32</sub> | C <sub>21</sub> H <sub>26</sub> O <sub>4</sub>  |    |
| E <sub>33</sub> | C <sub>23</sub> H <sub>34</sub> O <sub>4</sub>  |    |
| E <sub>34</sub> | C <sub>21</sub> H <sub>26</sub> O <sub>2</sub>  |    |
| E <sub>35</sub> | C <sub>21</sub> H <sub>26</sub> O               |    |
| E <sub>36</sub> | C <sub>21</sub> H <sub>24</sub> O               |    |
| E <sub>37</sub> | C <sub>21</sub> H <sub>24</sub> O <sub>2</sub>  |  |
| E <sub>38</sub> | C <sub>16</sub> H <sub>22</sub> O <sub>2</sub>  |  |
| E <sub>39</sub> | C <sub>16</sub> H <sub>22</sub> O <sub>4</sub>  |  |
| E <sub>40</sub> | C <sub>16</sub> H <sub>20</sub> O <sub>3</sub>  |  |
| F <sub>0</sub>  | C <sub>23</sub> H <sub>23</sub> F               |  |
| F <sub>1</sub>  | C <sub>23</sub> H <sub>23</sub> FO <sub>2</sub> |  |

|                 |                                                 |  |
|-----------------|-------------------------------------------------|--|
| F <sub>2</sub>  | C <sub>23</sub> H <sub>23</sub> FO              |  |
| F <sub>3</sub>  | C <sub>23</sub> H <sub>21</sub> FO              |  |
| F <sub>4</sub>  | C <sub>23</sub> H <sub>21</sub> FO <sub>2</sub> |  |
| F <sub>5</sub>  | C <sub>23</sub> H <sub>21</sub> FO <sub>3</sub> |  |
| F <sub>6</sub>  | C <sub>23</sub> H <sub>23</sub> FO <sub>4</sub> |  |
| F <sub>7</sub>  | C <sub>23</sub> H <sub>23</sub> FO <sub>3</sub> |  |
| F <sub>8</sub>  | C <sub>23</sub> H <sub>21</sub> FO <sub>3</sub> |  |
| F <sub>9</sub>  | C <sub>23</sub> H <sub>19</sub> FO <sub>2</sub> |  |
| F <sub>10</sub> | C <sub>23</sub> H <sub>19</sub> FO <sub>3</sub> |  |
| F <sub>11</sub> | C <sub>23</sub> H <sub>21</sub> FO <sub>4</sub> |  |
| F <sub>12</sub> | C <sub>23</sub> H <sub>23</sub> FO <sub>5</sub> |  |
| F <sub>13</sub> | C <sub>23</sub> H <sub>21</sub> FO <sub>5</sub> |  |



|                 |                                                 |                                                                                      |
|-----------------|-------------------------------------------------|--------------------------------------------------------------------------------------|
| F <sub>14</sub> | C <sub>23</sub> H <sub>23</sub> FO              | 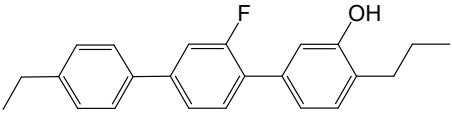   |
| F <sub>15</sub> | C <sub>23</sub> H <sub>25</sub> FO <sub>3</sub> |    |
| F <sub>16</sub> | C <sub>23</sub> H <sub>25</sub> FO <sub>2</sub> |    |
| F <sub>17</sub> | C <sub>23</sub> H <sub>25</sub> FO <sub>5</sub> |    |
| F <sub>18</sub> | C <sub>23</sub> H <sub>25</sub> FO <sub>4</sub> |    |
| F <sub>19</sub> | C <sub>23</sub> H <sub>23</sub> FO <sub>4</sub> |   |
| F <sub>20</sub> | C <sub>21</sub> H <sub>21</sub> FO <sub>2</sub> |  |
| F <sub>21</sub> | C <sub>21</sub> H <sub>21</sub> FO <sub>4</sub> |  |
| F <sub>22</sub> | C <sub>21</sub> H <sub>21</sub> FO <sub>3</sub> |  |
| F <sub>23</sub> | C <sub>21</sub> H <sub>19</sub> FO <sub>3</sub> |  |

|                 |                                                 |                                                                                    |
|-----------------|-------------------------------------------------|------------------------------------------------------------------------------------|
| F <sub>24</sub> | C <sub>21</sub> H <sub>19</sub> FO <sub>4</sub> | 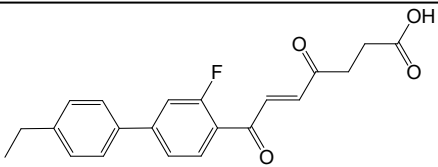 |
| F <sub>25</sub> | C <sub>15</sub> H <sub>13</sub> FO <sub>2</sub> |  |
| F <sub>26</sub> | C <sub>15</sub> H <sub>11</sub> FO <sub>3</sub> |  |
